# Supplementary material for: Genome-wide identification, characterization, and expression analysis of the sweet potato (Ipomoea batatas [L.] Lam.) ARF, Aux/IAA, GH3, and SAUR gene families
Source: PubMed Central journal article supplement (PMC10701959; doi:10.1186/s12870-023-04598-w), 2023-12-07

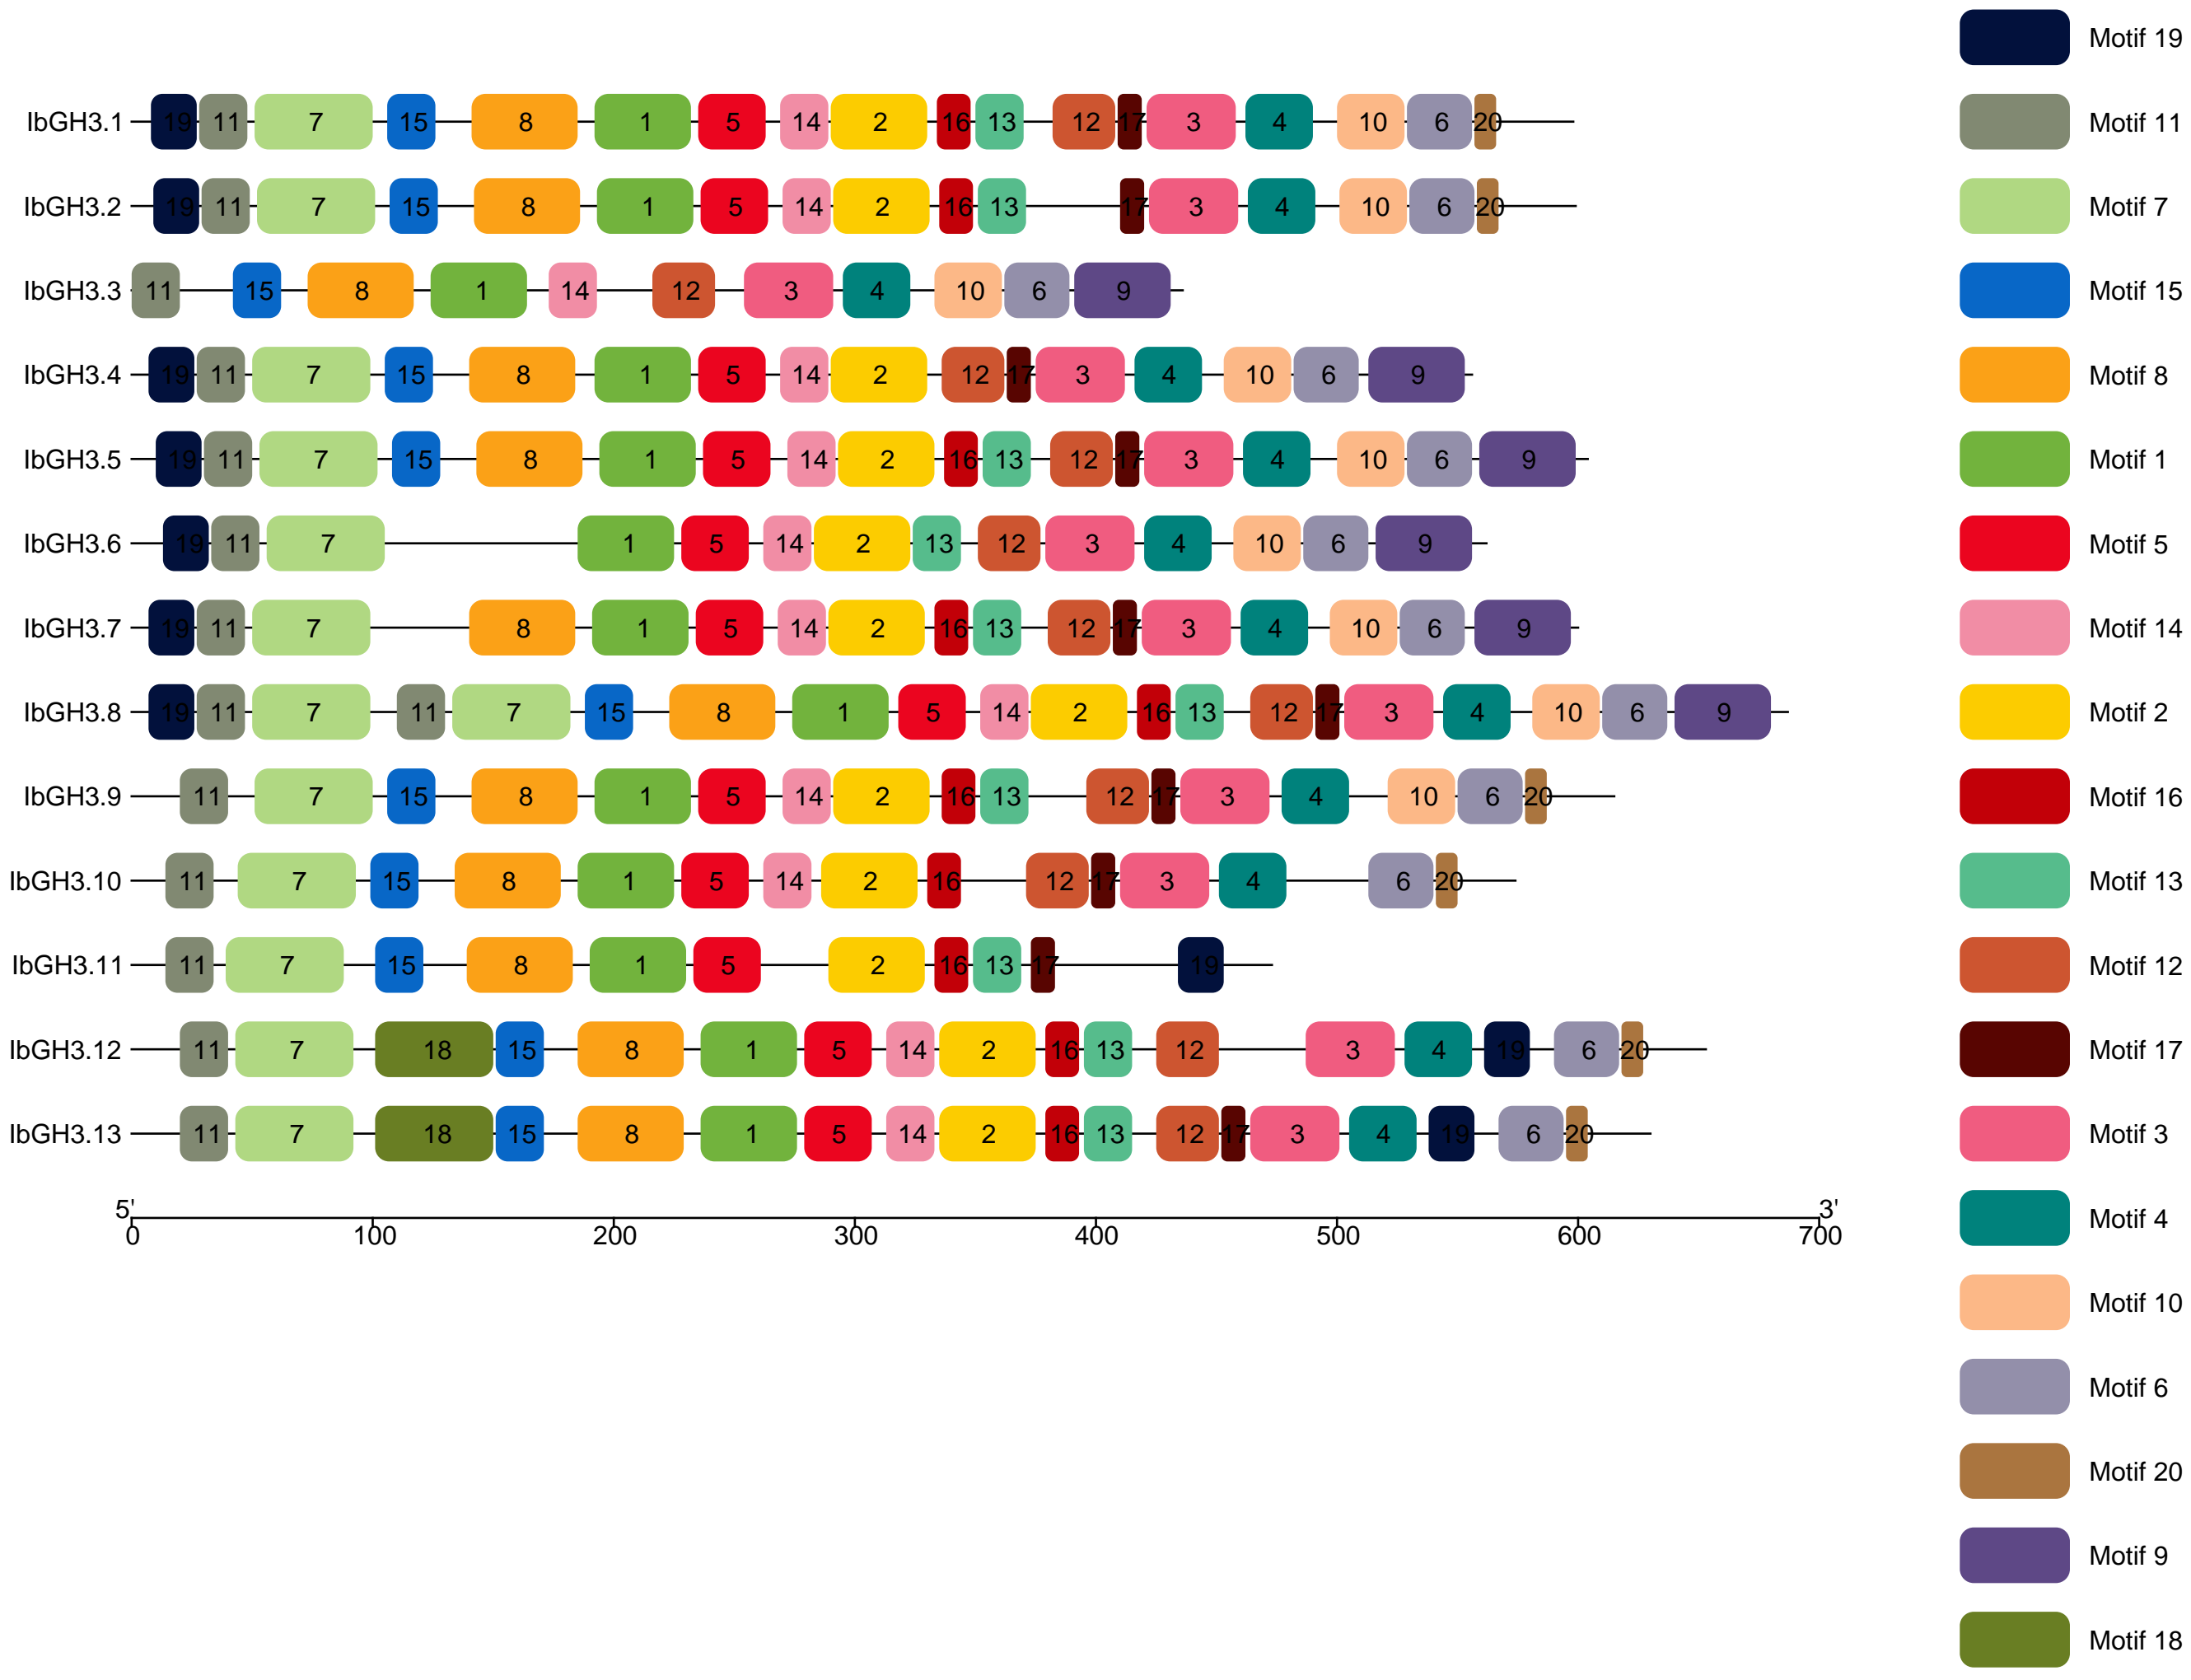

Supplement: 12870_2023_4598_MOESM5_ESM.pdf [file 12870_2023_4598_MOESM5_ESM.pdf]
